# Supplementary material for: Modeling of Disintegration and Dissolution Behavior of Mefenamic Acid Formulation Using Numeric Solution of Noyes-Whitney Equation with Cellular Automata on Microtomographic and Algorithmically Generated Surfaces
Source: MDPI journal article supplement (doi:10.3390/pharmaceutics10040259), 2018-12-03
Supplement: s1 [file s1]

# Supplementary Materials: Modeling of Disintegration and Dissolution Behavior of Mefenamic Acid Formulation Using Numeric Solution of Noyes-Whitney Equation with Cellular Automata on Microtomographic and Algorithmically Generated Surfaces

Reiji Yokoyama, Go Kimura, Christian M. Schlepütz, Jörg Huwyler and Maxim Puchkov

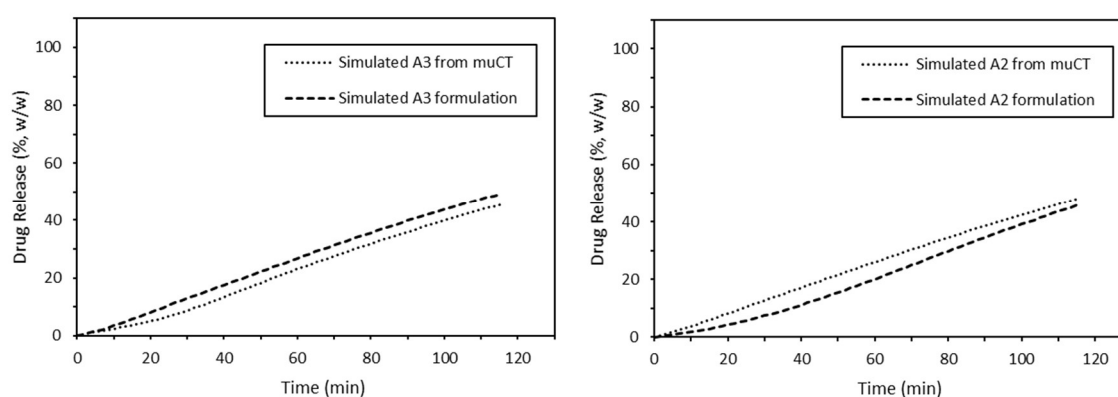

**Figure S1:** In silico drug release profiles obtained from simulations without the disintegration model of the algorithmically created tablet component arrangements, and the reconstructed matrices with the help of microtomography for formulations A3 (**left**) and A2 (**right**).
